# Supplementary material
Source: PubMed Central journal article supplement (PMC11261999)
Supplement: NIHMS1789357-supplement-Supplement.pdf [file NIHMS1789357-supplement-Supplement.pdf]

# Supplemental Material

**Supplemental Figure-I. Workflow of statistical analysis.** 24-hour NIH Stroke Scale score was analyzed as continuous,  $\Delta$ NIHSS (baseline minus 24-hour NIHSS), and percent change in NIHSS ( $\Delta$ NIHSS\*100/baseline NIHSS). Youden's index was used to identify the optimal cut-point of 24-hour NIHSS and  $\Delta$ NIHSS that best differentiate good vs bad outcome on the 90-day modified Rankin Scale score (mRS). Association of all of these measures with 90-day mRS dichotomized at 0-2 were evaluated using univariable and multivariable logistic regression and that with 90-day mRS on an ordinal scale were evaluated using the univariable and multivariable ordinal regression.

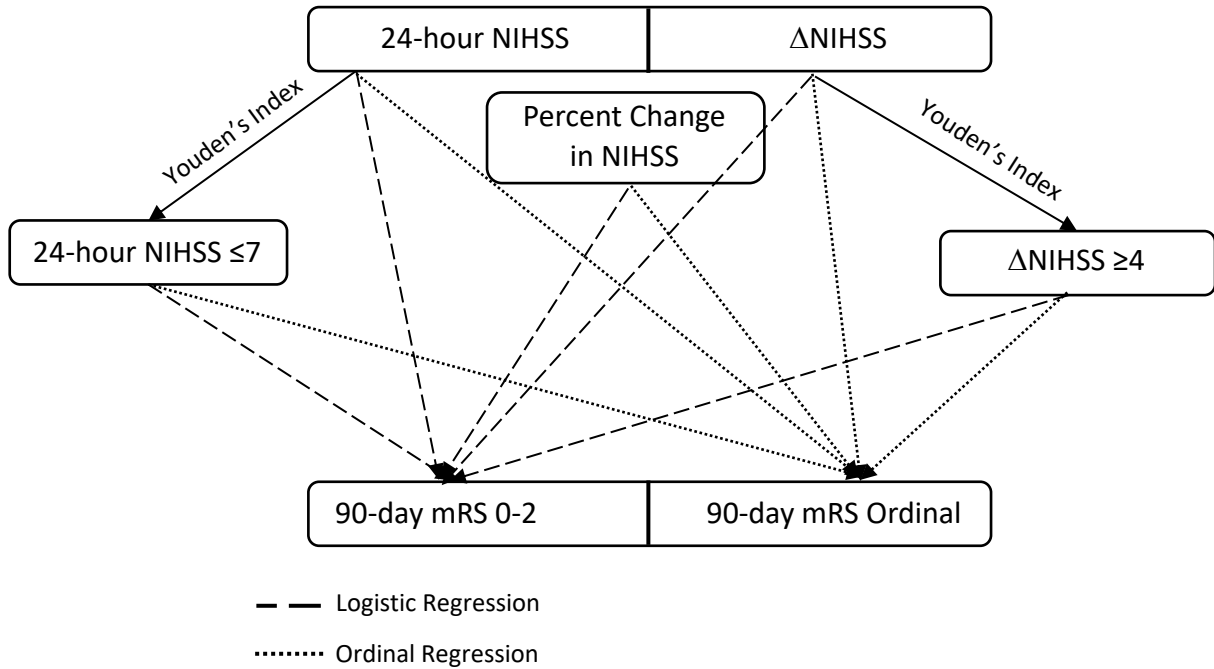

| Supplemental Table-I. Predictive Power of Various Definitions of Early Neurological Recovery in Predefined Multivariable Logistic Regression Models |                |       |
|-----------------------------------------------------------------------------------------------------------------------------------------------------|----------------|-------|
| Variable                                                                                                                                            | Adjusted rho^2 | rho^2 |
| <b>For 90-day mRS 0-2 outcome</b>                                                                                                                   |                |       |
| 24-hour NIHSS ≤7                                                                                                                                    | 0.358          | 0.359 |
| ΔNIHSS≥4                                                                                                                                            | 0.137          | 0.139 |
| 24-hour NIHSS                                                                                                                                       | 0.368          | 0.371 |
| ΔNIHSS                                                                                                                                              | 0.161          | 0.164 |
| Percent Change from Baseline                                                                                                                        | 0.155          | 0.156 |
| Age                                                                                                                                                 | 0.095          | 0.099 |
| ASPECTS                                                                                                                                             | 0.041          | 0.045 |
| Glucose                                                                                                                                             | 0.037          | 0.041 |
| Hypertension                                                                                                                                        | 0.238          | 0.026 |
| Baseline NIHSS                                                                                                                                      | 0.075          | 0.080 |
| Successful Recanalization                                                                                                                           | 0.024          | 0.026 |
| Intravenous thrombolysis                                                                                                                            | 0.013          | 0.015 |
| Time to recanalization                                                                                                                              | 0.003          | 0.037 |
| <b>For ordinal 90-day mRS outcome</b>                                                                                                               |                |       |
| 24-hour NIHSS ≤7                                                                                                                                    | 0.375          | 0.376 |
| ΔNIHSS≥4                                                                                                                                            | 0.155          | 0.157 |
| 24-hour NIHSS                                                                                                                                       | 0.444          | 0.446 |
| ΔNIHSS                                                                                                                                              | 0.187          | 0.191 |
| Percent Change from Baseline                                                                                                                        | 0.150          | 0.154 |
| Age                                                                                                                                                 | 0.137          | 0.141 |
| ASPECTS                                                                                                                                             | 0.042          | 0.046 |
| Glucose                                                                                                                                             | 0.051          | 0.055 |
| Hypertension                                                                                                                                        | 0.046          | 0.048 |
| Baseline NIHSS                                                                                                                                      | 0.096          | 0.099 |
| Successful Recanalization                                                                                                                           | 0.038          | 0.040 |
| Intravenous thrombolysis                                                                                                                            | 0.014          | 0.017 |
| Time to recanalization                                                                                                                              | 0.034          | 0.038 |
